# Supplementary material
Source: PubMed Central journal article supplement (PMC2570540)
Supplement: NIHMS71691-supplement-1.pdf [file NIHMS71691-supplement-1.pdf]

# Role of *Helicobacter pylori* SabA Adhesin During Persistent Infection and Chronic Inflammation

Jafar Mahdavi, Berit Sondén, Marina Hurtig, Farzad O. Olfat, Lina Forsberg, Niamh Roche, Jonas Ångström, Thomas Larsson, Susann Teneberg, Karl-Anders Karlsson, Siiri Altraja, Torkel Wadström, Dangeruta Kersulyte, Douglas E. Berg, Andre Dubois, Christoffer Petersson, Karl-Eric Magnusson, Thomas Norberg, Frank Lindh, Bertil B. Lundskog, Anna Arnqvist, Lennart Hammarström, Thomas Borén

## Supplementary material

### MATERIALS AND METHODS

**Supplemental Methods 1. For Adherence In Situ (AIS) (S1)**, biopsies were obtained from Drs. Ray Clouse, Washington University Medical Center, St. Louis, David Graham, VA Medical Center, Houston, and Intissar Anan, Umeå University. Gastric tissue sections from Leb mice and FVB/N mice were from Drs. Jeff Gordon and Per Falk, Washington University. To inhibit AIS (S1) *H. pylori* was labeled with FITC and mixed with Leb conjugate (10 µg/mL) or sialyl-Le x/a-conjugates (20 µg/mL) (IsoSep AB, Tullinge, Sweden). Alternatively, histo sections were pre-treated with the Leb mAb or the FH6 mAb (which recognizes the sdiLex antigen), at 1:100 dilution for 3 h. Reduction in bacterial binding was estimated by the number of adherent bacteria under 200X magnification. Each value is the mean +/- SEM of 10 different fields, with significance evaluated with the Student's t-Test.

---

**Supplemental Methods 2. *H. pylori* strains** 26695, CCUG17875 (designated 17875), the construction of the 17875*babA2*::cam-mutant, and the G27*cag*PAI-deletion mutant, were described in (S2). The construction of 17875*babA1*::kan *babA2*::cam (abbreviated the *babA1A2*-mutant), *sabA*(JHP662)::cam and the *sabB*(JHP659)::cam mutants were as described in (S2) with minor modifications (see Supplemental Methods 3). J99 was kindly provided by Drs. Tim Cover, John Atherton and Martin Blaser. The 77 *cag*<sup>+</sup> and 12 *cag*<sup>-</sup> Swedish isolates, including SMI65, were kindly provided by Dr. Lars Engstrand, and 6 Italian *cagA*<sup>-</sup> strains were described in (S2). Strain WU12 was from a patient with gastritis (Fig 1A-M), treated at Washington University Medical Center, St.

Louis. Strain J166 was described in (S3). The 17875/Leb strain, a spontaneous sLex<sup>-</sup> variant was isolated by screening single colonies of strain 17875. Bacteria were grown for 2 days on Brucella agar medium at 37°C, under 10 % CO<sub>2</sub> and 5% O<sub>2</sub>, for optimal binding.

---

**Supplemental Methods 3. Construction of *babA1A2*-, *sabA*-, *sabB*-, and *babA/sabA*-deletion mutants.** The 17875*babA1*::kan *babA2*::cam, J99*sabA*(JHP662)::cam, J99*sabB*(JHP659)::cam, and the J99*babA*::cam *sabA*::kan-mutant strains were constructed as described in (S2), with the following modifications;

**(3A) Strain CCUG17875 was used for construction of 17875*babA1*::kan *babA2*::cam (abbreviated the *babA1A2*-mutant).** The *babA1* gene was amplified using the F44 (forward) and R44 (reverse) primers, cloned into the pBluescript SK+/- EcoRV site (Stratagene, La Jolla CA), linearized with primers R41+F38, ligated with the KanR cassette from pILL600 (S4), and used to transform the original 17875*babA2*::cam mutant (S2). The transformants were analyzed by PCR using upstream primers F2 (*babA2*) or F44 (*babA1*) in combination with the R11 *babA* primer (located in the segment replaced by the KanR cassette). The 17875*babA1*::kan *babA2*::cam (double)-mutant (abbreviated the *babA1A2*-mutant) could not be amplified with either primer pair.

F2: CTAAATATCTCCCTATCCC  
R41: GCGAGCCTAAAGTTAATGA  
F38: ACGTGGCGAACTTCCAATTC  
F44: CAGTCAAGCCCAAAGCTATGC  
R11: CGATTTGATAGCCTACGCTTGTG  
R44: CTAAAGGGATAGGAAGCGCT

**(3B) Strain J99 was used for construction of the *sabA*(JHP662)::cam and the *sabB*(JHP659)::cam mutants.** *SabA* was PCR-amplified using the primers F18 and R17 and cloned in pBluescript SK+/- EcoRV site. The plasmid clone was linearized with R20 and F21 and ligated with the *camR* gene, described in (S2). *SabB* was amplified using primers F16 and R15, and cloned in pCR2.1-TOPO vector (Invitrogen, Carlsbad, CA), linearized with HincII and ligated with the *camR* gene. *H. pylori* transformants were analyzed for binding to <sup>125</sup>I-labeled sLex conjugate. The location of the *camR* gene in *sabA* and *sabB* was analyzed using primers R17+F18 and F16+R15, respectively, which verified

that loss of binding was dependent on the *cam*-insertion and independent of spontaneous OFF-(phase)-variation in sLex binding.

R15: CTATTCATGTTTACAATA  
F16: GGGTTTGTGTCGCACCACTAG  
R17: GGTTTCATTGTAAATATAT  
F18: CGATTCTATTAGATCACCC  
R20: AGCGTTCAATAACCCTTACAGCG  
F21: GATTTAAATACTGGCTTAATTGCTCG  
BS22: CGCTTAAAGCATTGTTGACAGCC

**(3C) Strain J99 was used for construction of the J99*babA*::*cam sabA*::*kan*-(double)-mutant.** For the construction of the *babAsabA*-mutant strain, *sabA* was first cloned in the pBluescript vector and linearized as described above, and then ligated with the KanR cassette (see above). For the construction of the J99*babA* and *babAsabA*-double mutants the J99 and J99*sabA*::*kan* strains were transformed with the *babA* deletion vector described in (S2). The transformants were analyzed by PCR using primers F33 + R34. The correct J99*babA*::*cam* and the J99*babA*::*cam sabA*::*kan*-(double)-mutant could not be amplified with the primer pair.

F33: ATCCTTTCATTAACCTTTAGGATCGC  
R34: TTGAGCGCTATCAGGCACAC

---

#### **Supplemental Methods 4. Retagging (of SabA) and Identification of *sabA*, the Gene which Corresponds to the Sialic acid binding Adhesin, SabA.**

For identification and purification of the SabA-adhesin, the Retagging technique was used, i.e., similar to the identification of the Leb antigen binding BabA-adhesin (S2), with some modifications. Here, the *babA1A2*-mutant was incubated with Sulfo-SBED (Pierce, Rockville, IL.) attached to sLex-conjugate. The crosslinker was activated by overnight UV irradiation, and biotin-(Re)tagged proteins were purified with magnetic streptavidin beads. The 66kDa band purified was digested with Trypsin (seq grade, Promega, USA) and four purified peptides were identified by mass spectrometry based on peptide masses and sequences. MALDI-TOF-MS on a ToF-Spec E mass spectrometer (Micromass, Manchester, England) (S5), and ProFound ([www.proteometrics.com](http://www.proteometrics.com)) was used for matching of the four peptide masses using NCBI database. Peptides 1 and 2 (see below) match the JHP662 (S6)/HP0725 (S7) gene. Peptides 3 and 4 also matched the JHP659 (S6)/HP0722 (S7) gene. Peptide identities were validated by ESI-MS/MS sequencing on a Q-ToF instrument (Micromass), using the nanospray source (S8).

Mascot ([www.matrixscience.com](http://www.matrixscience.com)) identified the peptide sequences (numbered according to the JHP662 peptide sequence:

(1) aa68-QSIQNANNIELVNSSLNYLK-aa87

(2) aa301-DIYAFAQNQK-aa310

(3) aa500-YYGFFDYNHGYIK-aa512

(4) aa620-IPTINTNYYSFLGTK-aa634

---

#### **Supplemental Methods 5. Presence of the *sabA* gene.**

The presence of *sabA* in clinical *H. pylori* isolates was analyzed by PCR using primer pairs F1 + 5R, and 3F + 1R.

1F: CTCTAGCAATGTGTGGCAG

3F: CGCTAGTGTCCAGGGTAAC

1R: GCGCTGTAAGGGTTATTGAAC

5R: CCGCGTATTGCGTTGGGTAG

---

#### **Supplemental Methods 6. *H. pylori* overlay to HPTLC separated glycosphingolipids (GSLs).**

Mixtures of GSLs (20-40  $\mu\text{g}/\text{lane}$ ) or pure compounds (0.002-4  $\mu\text{g}/\text{lane}$ ) were separated on silica gel 60 HPTLC plates (Merck) and chemically detected with anisaldehyde. Binding of  $^{35}\text{S}$ -labeled *H. pylori* to TLC separated GSLs was according to (S9). The KM-93 mAb (Seikagaku Corp., Tokyo, Japan) was detected using  $^{125}\text{I}$ -rabbit anti mouse antibodies from Dako, Glostrup, Denmark.

---

#### **Supplemental Methods 7. Isolation and identification of the *sdiLex* GSL**

The *babA1A2*-mutant strain was used to purify a high affinity GSL with receptor activity from human gall bladder adenocarcinoma tissue, which is a rich source of extended  $\square$ 1,3-fucosylated gangliosides (S10), by chromatography on silicic acid columns, as described (S11). Fractions were tested for *babA1A2*-mutant binding. Desialylation was performed by mild acid hydrolysis in 1% (v/v) acetic acid for 1 hr at 100°C. Negative ion FAB mass spectra were recorded on a JEOL SX-102A mass spectrometer (JEOL, Tokyo, Japan). The ions were produced by 6 keV xenon atom bombardment, using triethanolamine as matrix and an accelerating voltage of -10 kV.  $^1\text{H}$  NMR spectra were obtained on a Varian 600 MHz machine at 30°C using dimethylsulfoxide- $d_6$ /D $_2$ O (98/2) as solvent. The NMR spectrum was compared with earlier published data for

this structure recorded at 55°C (S12) and corresponding structural elements of the Y-6 glycosphingolipid recorded at 30°C (S13). The *H. pylori* binding GSL was then identified by negative ion FAB mass spectrometry and <sup>1</sup>H NMR as NeuAc $\beta$ 2.3Gal $\beta$ 1.4(Fuc $\alpha$ 1.3)GlcNAc $\beta$ 1.3Gal $\beta$ 1.4(Fuc $\alpha$ 1.3)GlcNAc $\beta$ 1.3Gal $\beta$ 1.4Glc $\beta$ 1Cer (Figs. 2B: lane 6, and 2C) (i.e., the sialyl-dimeric-Lewis x glycosphingolipid), abbreviated sdiLex.

---

### **Supplemental Methods 8. RIA and Scatchard analyzes**

SLea, sLex, and Leb glycoconjugates (IsoSep AB), and sdiLex-glycoconjugate synthesized according to (S14), (all based on albumin), were labeled with <sup>125</sup>I by the chloramine T method and mixed with *H. pylori* bacteria for binding and Scatchard analyzes (S15), essentially as described in (S2). The binding experiments were performed in triplicates.

---

### **Supplemental Methods 9. Gastric biopsies analyzed for *H. pylori* binding activity and inflammatory scores**

Gastric biopsies from 29 individuals without dysplasia were H/E-stained and evaluated for lymphocyte/ plasmacell infiltration. PMN cell infiltration was evaluated from rare PMNs only found in the lamina propria, up to pit abscesses. SLex antigen expression was analyzed by the KM-93 mAb in the surface mucous cells/gastric pit region. Histological gastritis was also graded. *H. pylori* was Genta-stained and quantified. AIS was scored by the number of bacteria/gastric pit region. Each value is the mean of 5 different fields. All scores are available in Table S2A. Adherence scores were correlated with infiltration scores of lymphocytes/plasmacells, PMNs, staining scores by sLex mAb, gastritis and also *H. pylori* infections, and statistically analyzed according to Pearson.

---

### **Supplemental Methods 10. Gastric biopsies of monkey E6C**

of monkey E6C were taken 6 months post-cure (for Figs. 4A and 4B). Final biopsy samples from E6C were taken 9 months after established re-infection (Figs. 4C-4F) (S3). Biopsies were stained with the KM-93 mAb, and AIS by the *babA1A2*-mutant was analyzed as described in Supplemental Methods 1.

## Supplemental Figure 1. Alignment of JHP662/ JHP659,

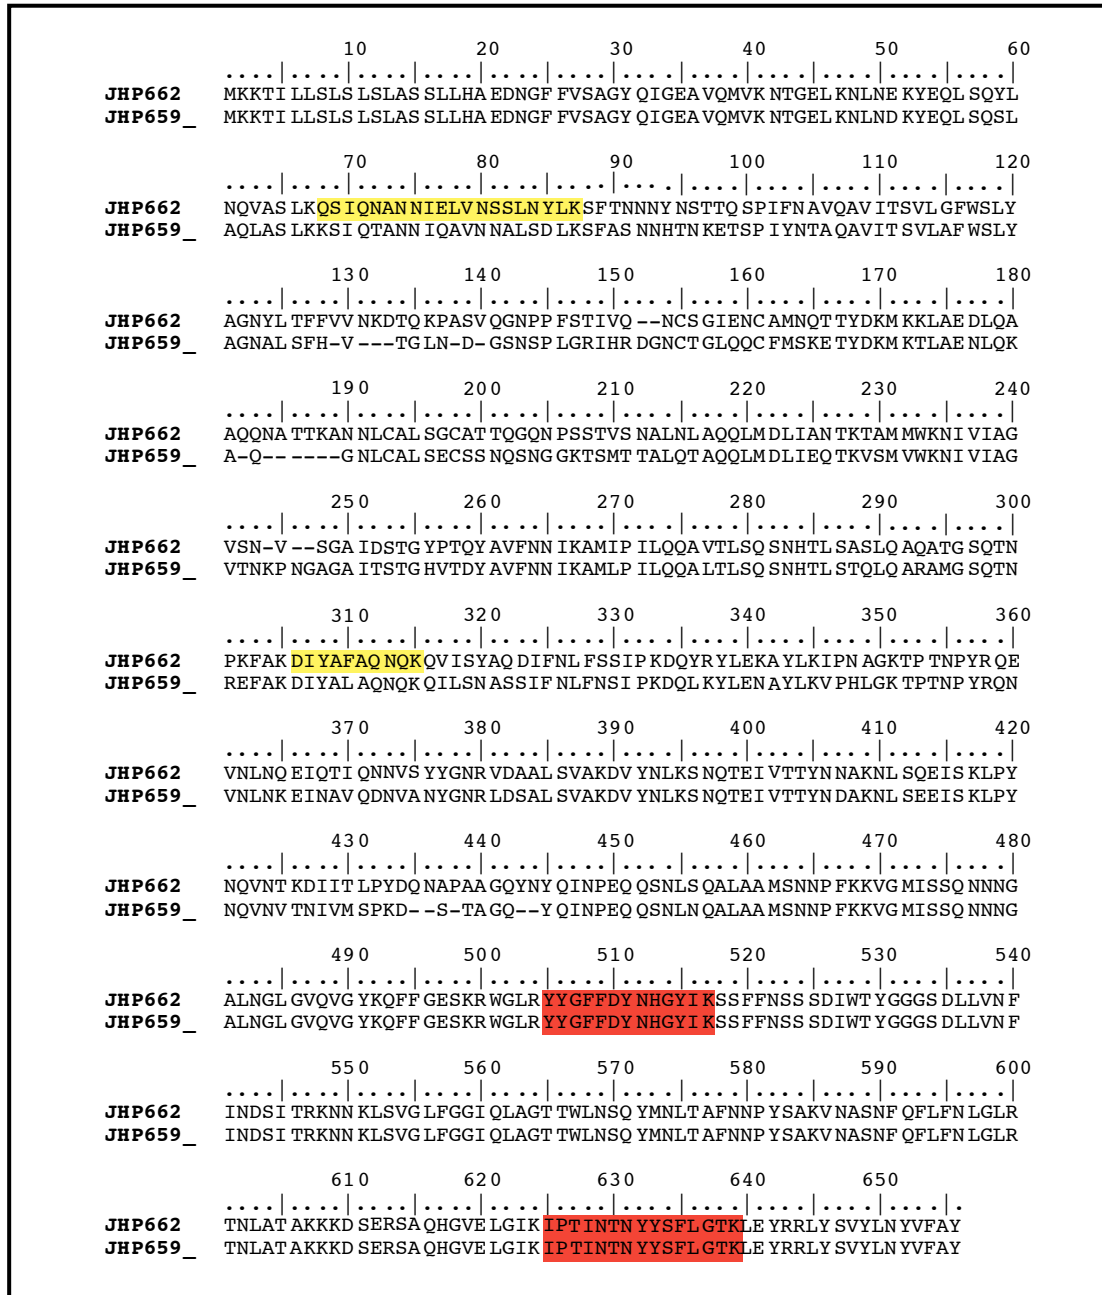

All four peptides were aligned with the JHP662 gene (4 peptide match), while only (2 (red) peptides matched) the JHP659 gene. Thus, the results suggest that *sabA* correspond to the JHP662 gene (*S6*)/ HP0725 (*S7*) gene.



**Supplemental Figure 2. Apical localization of epithelial sLex antigens in inflamed gastric epithelium**

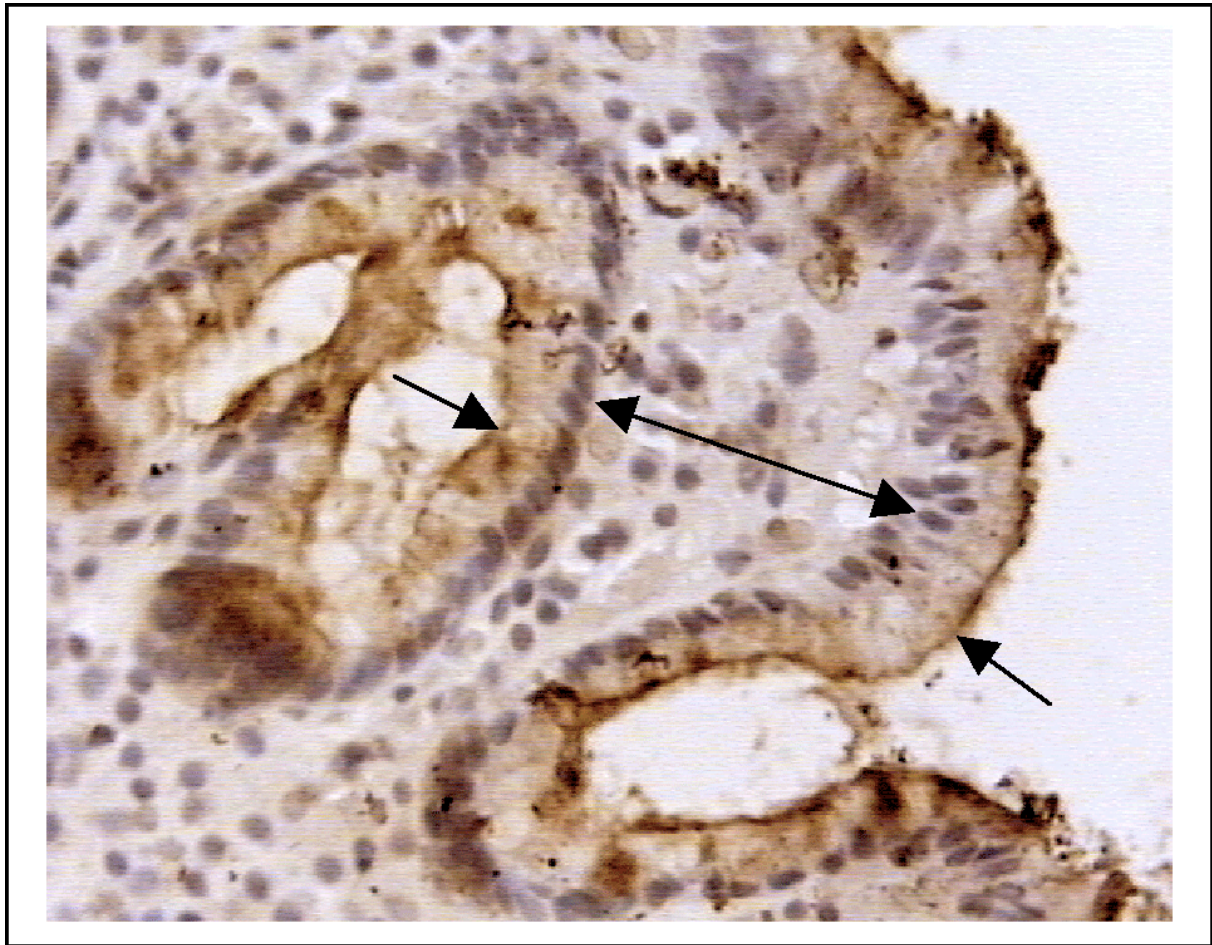

Sialylated glycoconjugates, such as sLex are rare in healthy human stomachs, but sialylation is upregulated during chronic inflammation and gastritis. The cellular (topical) localization of the sialylated antigens was investigated using a sLex specific mAb. In the figure (400x magn.), the sLex antigen is visualized in dark staining lining the apical surfaces (single arrows). In contrast, the clue of nucleus (which is located towards the basolateral side of the cells) stained with Mayer's hematoxylin (double arrow). The results suggest that the sLex-antigen is expressed at the apical surfaces of the epithelial cells, in response to *H. pylori* adherence and stimuli.

For immunohistochemistry, sections (5  $\mu$ m) of inflamed gastric mucosa were stained with the sLex specific mAb ((KM-93), Seikagaku Corp., Tokyo, Japan), in 1:10 dilution, and the immuno reactivity was assessed using the Vectastain Elite Kit/DAB (Vector Laboratories, NY). After counterstaining in Mayer's hematoxyline, the sections were examined with Zeiss Axioscope and color video camera (ZVS-47E, Carl Zeiss Inc.).

---

**Supplemental Table 1. Summary of *Helicobacter pylori* binding to glycosphingolipids**

| No. | Name              | Sequence                                                                  | 1  | 2   | Source                       |
|-----|-------------------|---------------------------------------------------------------------------|----|-----|------------------------------|
| 1.  | Lewis b           | Fuca2Galb3GlcNAcb3Galb4Glc1Cer<br>Fuc□1 <sup>4</sup>                      | +3 | -   | Human small intestine        |
| 2.  | GM3               | NeuAca3Galb4Glc1Cer                                                       | -  | -   | Calf brain                   |
| 3.  | GM1               | Galb3GalNAcb4Galb4Glc1Cer<br>NeuAca2 <sup>3</sup>                         | -  | -   | Calf brain                   |
| 4.  | GD1a              | NeuAca3Galb3GalNAcb4Galb4Glc1Cer<br>NeuAca2 <sup>3</sup>                  | -  | -   | Calf brain                   |
| 5.  | GD1b              | Galb3GalNAcb4Galb4Glc1Cer<br>NeuAca8NeuAca2 <sup>3</sup>                  | -  | -   | Calf brain                   |
| 6.  | Sialyl-Lewis a    | NeuAca3Galb3GlcNAcb3Galb4Glc1Cer<br>Fuc□1 <sup>4</sup>                    | -  | -   | Human gall bladder carcinoma |
| 7.  | Sialyl-Lewis x    | NeuAca3Galb4GlcNAcb3Galb4Glc1Cer<br>Fuc□1 <sup>3</sup>                    | -  | (+) | Synthetic from Symbicom Ltd. |
| 8.  | Sialyl-di-Lewis x | NeuAca3Galb4GlcNAcb3Galb4GlcNAcb3Galb4Glc1Cer<br>Fuca1 <sup>3</sup> Fuca1 | -  | +3  | Human gall bladder carcinoma |

**1.** Binding obtained with strain CCUG17875 **2.** Binding obtained with the *babA1A2* mutant strain. Binding is defined as follows: **+3** denotes a significant darkening on the autoradiogram when 1 pmol of substance was applied on the thin-layer plate; **+** denotes a darkening at 2 nmol; **(+)** an occasional darkening at 2 nmol; **while—** denotes no darkening even at 2 nmol.



**Supplemental Table 2A. Gastric biopsies from 29 patients were scored for binding by the *babA1A2*-mutant and the parental strain 17875 in situ, and for several markers of inflammation.**

| Biopsy sample | 17875-binding | <i>babA1A2</i> -binding | Lymphocyte (1) | PMN cell (2) | IH-total | IH-gastric pit | <i>H. pylori</i> | Hist. gastritis |
|---------------|---------------|-------------------------|----------------|--------------|----------|----------------|------------------|-----------------|
| TB 21         | 5(687)        | 1(16)                   | 0              | 0            | 1        | 1              | 0                | 0,5             |
| TB 16         | 4(459)        | 1(14)                   | 0              | 0            | 1        | 1              | 0                | 0,5             |
| TB 15         | 1(38)         | 0(0)                    | 0              | 0            | 1        | 1              | 0                | 1               |
| TB 14         | 5(712)        | 1(15)                   | 0              | 1            | 3        | 2              | 0                | 0,5             |
| TB 12         | 3(289)        | 4(48)                   | 2              | 2            | 5        | 5              | 3                | 3               |
| TB 9          | 5(633)        | 1(17)                   | 1              | 1            | 1        | 1              | 0                | 0               |
| HS+B+A        | 1(38)         | 0(0)                    | 1              | 0            | 1        | 1              | 0                | 0,5             |
| 16519 A3      | 5(573)        | 1(13)                   | 2              | 3            | 3        | 2              | 1                | 2               |
| 14167 A4      | 5(529)        | 1(15)                   | 2              | 1            | 3        | 4              | 1                | 2               |
| 14814 A3      | 5(667)        | 1(13)                   | 3              | 2            | 1        | 1              | 2                | 3               |
| 15393 A3      | 4(381)        | 4(51)                   | 3              | 2            | 2        | 3              | 1                | 3               |
| 8900 A2       | 5(793)        | 1(16)                   | 1              | 1            | 2        | 2              | 2                | 1               |
| 8956 A2       | 5(605)        | 2(23)                   | 1              | 2            | 1        | 1              | 0,5              | 1               |
| 9220 A4       | 5(593)        | 2(19)                   | 2              | 3            | 4        | 3              | 1                | 2               |
| 12486 A4      | 5(558)        | 0(0)                    | 1              | 1            | 4        | 3              | 1                | 2               |
| 15143 A3      | 2(111)        | 2(21)                   | 2              | 2            | 5        | 5              | 1                | 2               |
| 15606 A4      | 5(629)        | 3(33)                   | 1              | 1            | 3        | 4              | 0                | 3               |
| 15981 A3      | 5(803)        | 0(0)                    | 2              | 2            | 3        | 4              | 2                | 3               |
| 16849 A4      | 5(587)        | 1(13)                   | 2              | 5            | 4        | 2              | 1                | 2               |
| 17961 A3      | 5(839)        | 3(37)                   | 3              | 3            | 4        | 4              | 1                | 2               |
| 15754 A5      | 3(223)        | 3(29)                   | 2              | 5            | 5        | 5              | 0,5              | 2               |
| 15754 B5      | 4(439)        | 4(43)                   | 1              | 3            | 5        | 5              | 0,5              | 1               |
| 15187 A5      | 5(750)        | 3(38)                   | 3              | 5            | 4        | 3              | 1                | 2               |
| 15187 B6      | 5(713)        | 1(14)                   | 1              | 3            | 4        | 3              | 1                | 1               |
| 14690 B5      | 1(39)         | 4(51)                   | 3              | 5            | 4        | 3              | 1                | 3               |
| 14322 A4      | 3(267)        | 1(15)                   | 2              | 5            | 3        | 3              | 3                | 2               |
| 14322 B4      | 4(419)        | 3(28)                   | 2              | 5            | 4        | 2              | 2                | 1               |
| 14238 A3      | 1(38)         | 4(47)                   | 2              | 5            | 5        | 4              | 1                | 3               |
| 14238 B6      | 1(41)         | 3(38)                   | 1              | 2            | 5        | 4              | 1                | 1               |

**Supplemental Table 2B. Gastric biopsies from 6 *H. pylori* non-infected individuals were scored for binding in situ by the *babA1A2*-mutant and the parental strain 17875.**

| Biopsy sample | 17875-binding | <i>babA1A2</i> -binding | <i>H. pylori</i> infection |
|---------------|---------------|-------------------------|----------------------------|
| No. 61        | 3(160)        | 1(12)                   | 0                          |
| No. 62        | 4(485)        | 1(10)                   | 0                          |
| No. 70        | 2(68)         | 0(7)                    | 0                          |
| No. 64        | 4(463)        | 0(8)                    | 0                          |
| D6            | 5(513)        | 0(8)                    | 0                          |
| F73           | 2(96)         | 0(4)                    | 0                          |

## **Grading scale used for Tables 2A and 2B**

### **CCUG17875-binding**

Grading scale from 0 to 5, based on number of bacterial cells/gastric pit  
Grade 0 = no bacteria, Grade 1 = 1-50 bacteria, Grade 2 = 50-150 bacteria  
Grade 3 = 150-350 bacteria, Grade 4 = 350-500 bacteria, Grade 5  $\geq$ 500 bacteria

### ***babA1A2*-mutant binding**

Grading scale from 0 to 5, based on number of bacterial cells/ gastric pit  
Grade 0 = no bacteria, Grade 1 = 10-15 bacteria, Grade 2 = 15-25 bacteria  
Grade 3 = 25-40 bacteria, Grade 4 = 40-55 bacteria, Grade 5  $\geq$  55 bacteria

### **Lymphocyte infiltration (1)**

Grading scale from 0 to 3, based on both lymphocyte and plasmacell infiltration  
Grade 0= normal, Grade 1 = low inflammation, Grade 2 = moderate inflammation, Grade 3 = heavy inflammation

### **PMN cell infiltration (2)**

Grading scale from 0 to 5  
Grade 0 = none, Grade 1 = rare PMN, only in lamina propria (LP), Grade 2  $\leq$  1 intraepithelial (IE) PMN/high power field (hpf), i.e. 400X magnification, Grade 3 = 1-10 IE/hpf, Grade 4  $\geq$  10 IE/hpf, Grade 5 = pit abscess

### **Immunohisto-staining by anti-sLex-mAb (IH)**

Grading scale from 0 to 5  
IH-total: IH-staining of whole tissue section  
IH-gastric pit: IH-staining of gastric pit region

### ***H. pylori* in surface epithelium (Genta-stained)**

0.5 very few; 1 good colonization; 2 very good colonization; 3; heavy colonization

### **Histological gastritis**

0.5-1 minimal; 2 superficial; 3: intense

---

## References and Notes

1. T. Borén, P. Falk, K. A. Roth, G. Larson, S. Normark, *Science* **262**, 1892 (1993).
2. D. Ilver *et al.*, *Science* **279**, 373 (1998).
3. A. Dubois *et al.*, *Gastroenterology* **116**, 90 (1999).
4. S. Suerbaum, C. Josenhans, A. Labigne, *J. Bacteriol.* **175**, 3278 (1993).
5. T. Larsson, J. Bergström, C. Nilsson, K. A. Karlsson, *FEBS Letters* **469**, 155 (2000).
6. R. A. Alm *et al.*, *Nature* **397**, 176 (1999).
7. J. F. Tomb *et al.*, *Nature* **388**, 539 (1997).
8. O. Nørregaard-Jensen, M. Wilm, A. Shevchenko, M. Mann, in *Methods in Molecular Biology*, A. J. Link, Ed. (Humana Press, 1999), pp. 571-588.
9. J. Ångström *et al.*, *Glycobiology* **8**, 297 (1998)
10. S. i. Hakomori, *Adv. Cancer Res.* **52**, 257 (1989).
11. K. A. Karlsson. *Methods Enzymol.* **138**, 212 (1987).
12. S. B. Levery, E. D. Nudelman, N. H. Andersen, S. i. Hakomori, *Carbohydr. Res.* **151**, 311 (1986).
13. M. Blaszczyk-Thurin *et al.*, *J. Biol. Chem.* **262**, 372 (1987).
14. M. Bårström, M. Bengtsson, O. Blixt, T. Norberg, *Carbohydr. Res.* **328**, 525 (2000).
15. G. Scatchard, *Ann. N.Y. Acad. Sci.* **51**, 660 (1949).
